# Supplementary material for: The Role of GeneXpert® for Tuberculosis Diagnostics in Brazil: An Examination from a Historical and Epidemiological Perspective
Source: MDPI journal article supplement (doi:10.3390/tropicalmed8110483), 2023-10-26
Supplement: s1 [file s1]

**Supplementary Table S1.** Trend analysis of the historical of *Mycobacterium tuberculosis* (MTB) and rifampicin (RIF)-resistant frequency series from 2014 to 2020 by Brazilian region.

| Region    | MTB Frequency |            |                |    |         | RIF-Resistance MTB Frequency |             |                |    |         |
|-----------|---------------|------------|----------------|----|---------|------------------------------|-------------|----------------|----|---------|
|           | A             | INTERPR    | X <sup>2</sup> | GL | P-value | A                            | INTERPR     | X <sup>2</sup> | GL | P-value |
| <b>N</b>  | 3367,69       | Increasing | 215,25         | 1  | <0.0001 | -149,08                      | Decreasing  | 8,9065         | 1  | 0,0028  |
| <b>NE</b> | -1198,89      | Decreasing | 12,58          | 1  | 0,0004  | -21,38                       | Not applied | 0,0804         | 1  | 0,7767  |
| <b>SE</b> | 3313,76       | Increasing | 37,75          | 1  | <0.0001 | -433,00                      | Decreasing  | 14,8746        | 1  | 0,0001  |
| <b>S</b>  | 1875,85       | Increasing | 70,22          | 1  | <0.0001 | -70,78                       | Not applied | 2,2855         | 1  | 0,1306  |
| <b>CW</b> | 554,91        | Increasing | 13,93          | 1  | 0,0002  | 436,22                       | Increasing  | 210,3732       | 1  | <0.0001 |
| <b>BR</b> | 11167,98      | Increasing | 231,61         | 1  | <0.0001 | -225,86                      | Not applied | 2,1219         | 1  | 0,1452  |

Information source: Elaborate by the authors, based on data from SINAN/CGDR/MS/IBGE, 2014-2020.
